# Supplementary material
Source: publisher figshare collection journal article supplement (https://diabetesjournals.figshare.com/articles/dataset/_/24438229)
Supplement: Supplementary file 2 [file 1]

## Online-Only Supplementary Materials

### List of Investigators

Wenying Yang, China

Bo Zhang, China

Zhifeng Cheng, China

Xin Zhang, China

Dexue Liu, China

Hongwei Jiang, China

Guoqing Ma, China

Xiaoyun Wang, China

Shenglian Gan, China

Juan Sun, China

Ping Jin, China

Jianjun Yi, China

Xianling Zheng, China

Bimin Shi, China

Yikun Zhu, China

Xiaolin Dong, China

Jianhua Ma, China

Xueqin Wang, China

Su Wang, China

Shandong Ye, China

Weiping Lu, China

Guixia Wang, China

Yibin Lu, China

Yuezhong Ren, China

Haixia Wen, China

Qingyuan Sun, China

Yawei Zhang, China

Qiaohua Ren, China

Qiong Yu, China

Linong Ji, China

Meiying Zhang, China

Ziling Li, China

Xuejiang Gu, China

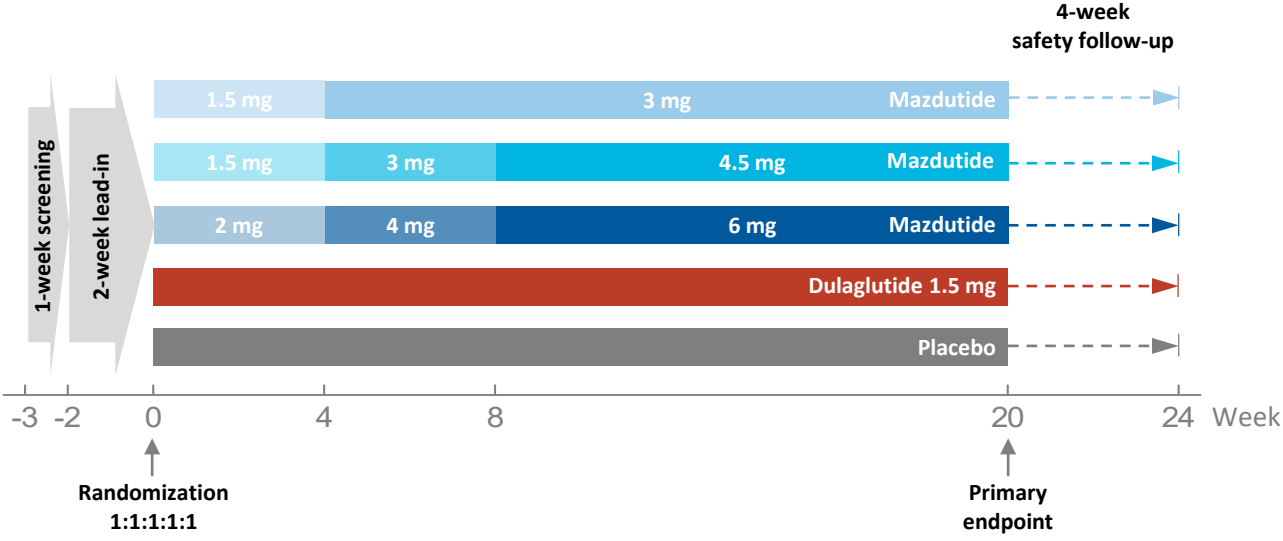

Supplementary Figure 1: Study design

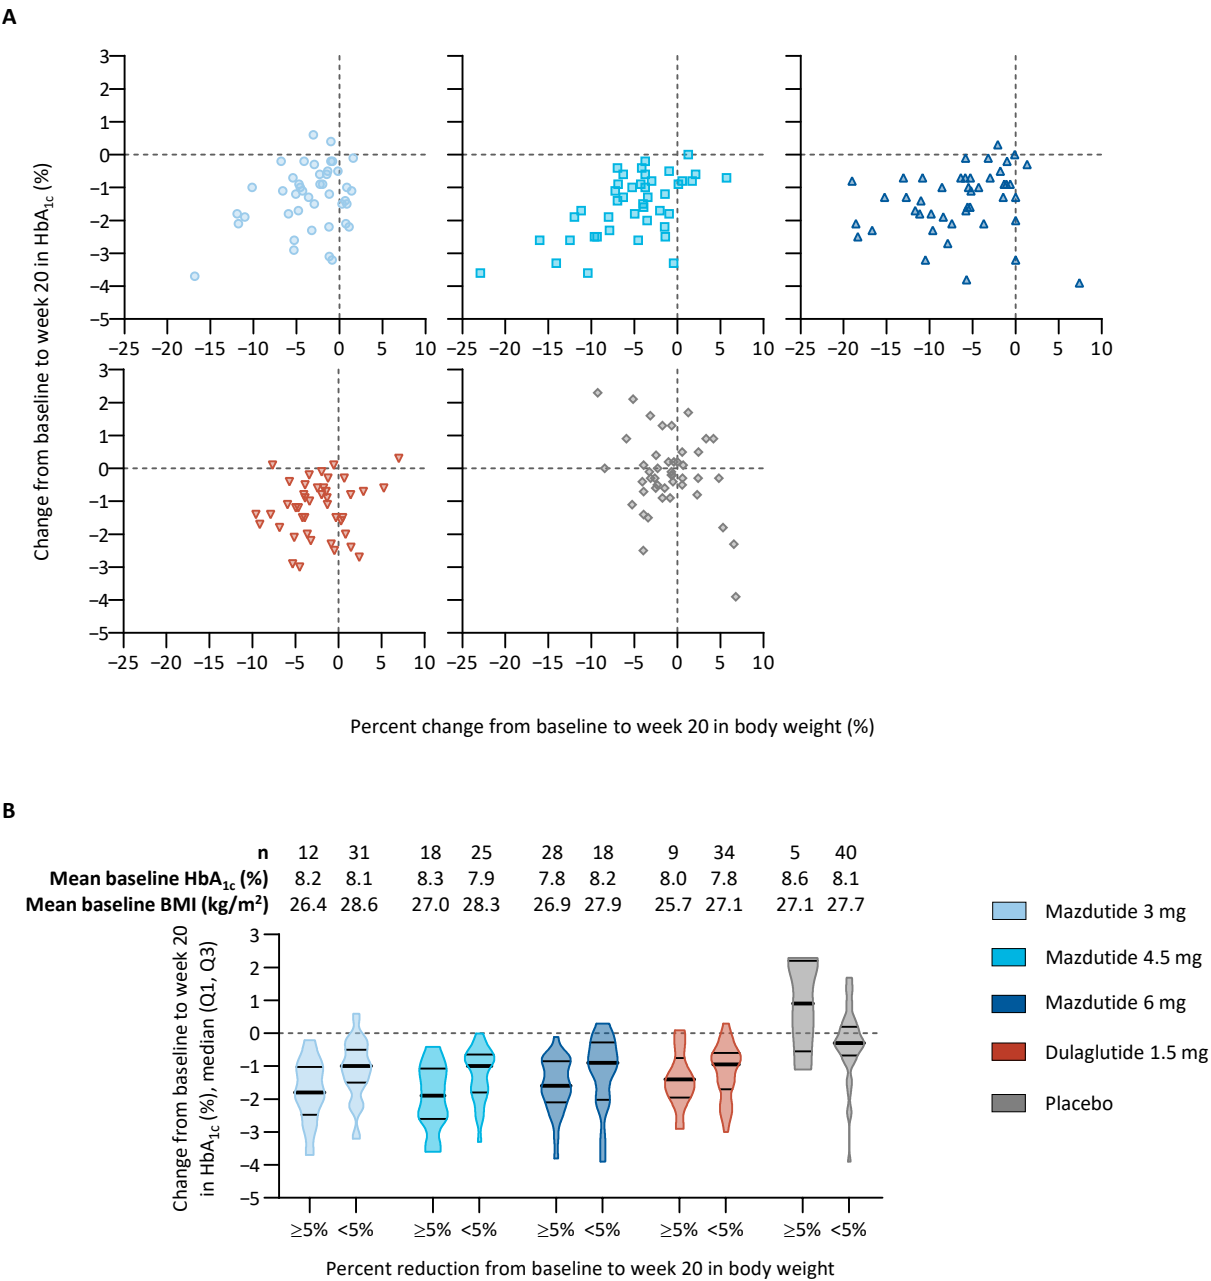

**Supplementary Figure 2: Changes in HbA<sub>1c</sub> and body weight**

**A.** Change from baseline to week 20 in bodyweight and HbA<sub>1c</sub> for each participant. **B.** Change from baseline to week 20 in HbA<sub>1c</sub>, stratified by body weight loss category (percent reduction from baseline to week 20  $\geq 5\%$  or  $< 5\%$ ). Data are presented as violin plots, with thick lines indicating medians and thin lines indicating interquartile ranges. Includes participants with week 20 measurement. BMI=body-mass index. HbA<sub>1c</sub>=glycated hemoglobin A<sub>1c</sub>.

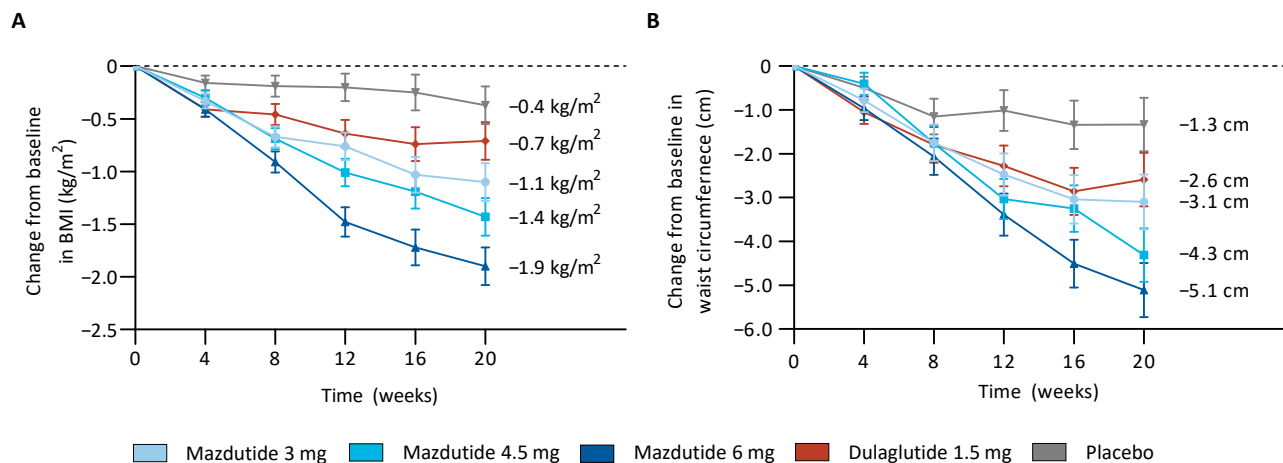

**Supplementary Figure 3: Change from baseline in BMI (A) and waist circumference (B) over time**

Data are least squares means  $\pm$  standard errors from MMRM analysis, mITT population. Mazdutide 3 mg  $n = 50$ ; mazdutide 4.5 mg  $n = 48$ ; mazdutide 6 mg  $n = 49$ ; placebo  $n = 51$ ; dulaglutide  $n = 50$ . BMI=body-mass index. MMRM=mixed model repeated measures.

A

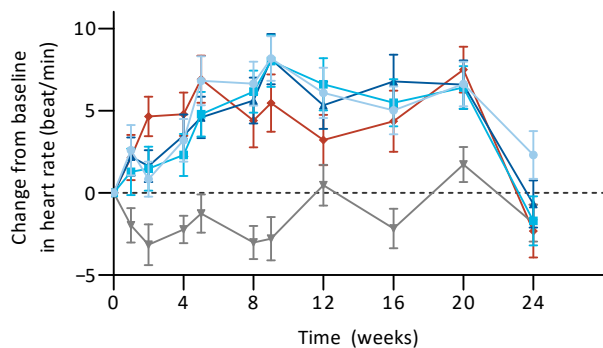

B

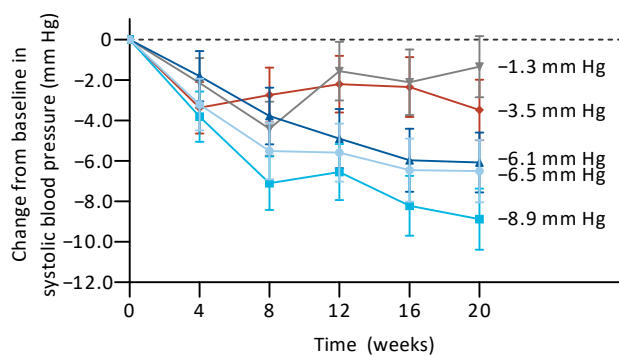

C

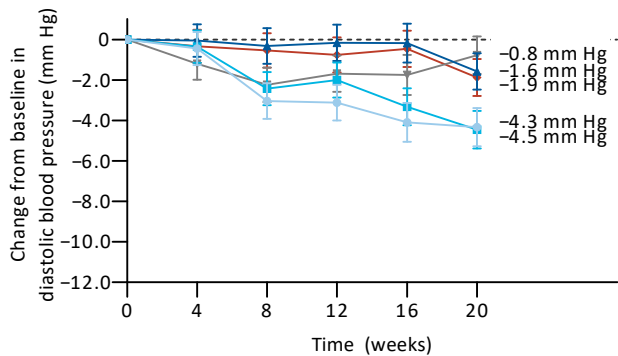

Legend: Mazdutide 3 mg (light blue), Mazdutide 4.5 mg (medium blue), Mazdutide 6 mg (dark blue), Dulaglutide 1.5 mg (red), Placebo (grey)

**Supplementary Figure 4: Change from baseline in heart rate (A) and blood pressure (B and C) over time**

Data are mean  $\pm$  SE for changes in heart rate, safety population; least squares means  $\pm$  SE for changes in blood pressure from MMRM analysis, mITT population. For safety population, mazdutide 3 mg  $n = 51$ ; mazdutide 4.5 mg  $n = 49$ ; mazdutide 6 mg  $n = 49$ ; placebo  $n = 51$ ; dulaglutide  $n = 50$ . For mITT population, mazdutide 3 mg  $n = 50$ ; mazdutide 4.5 mg  $n = 48$ ; mazdutide 6 mg  $n = 49$ ; placebo  $n = 51$ ; dulaglutide  $n = 50$ . MMRM=mixed model repeated measures. SE=standard error.

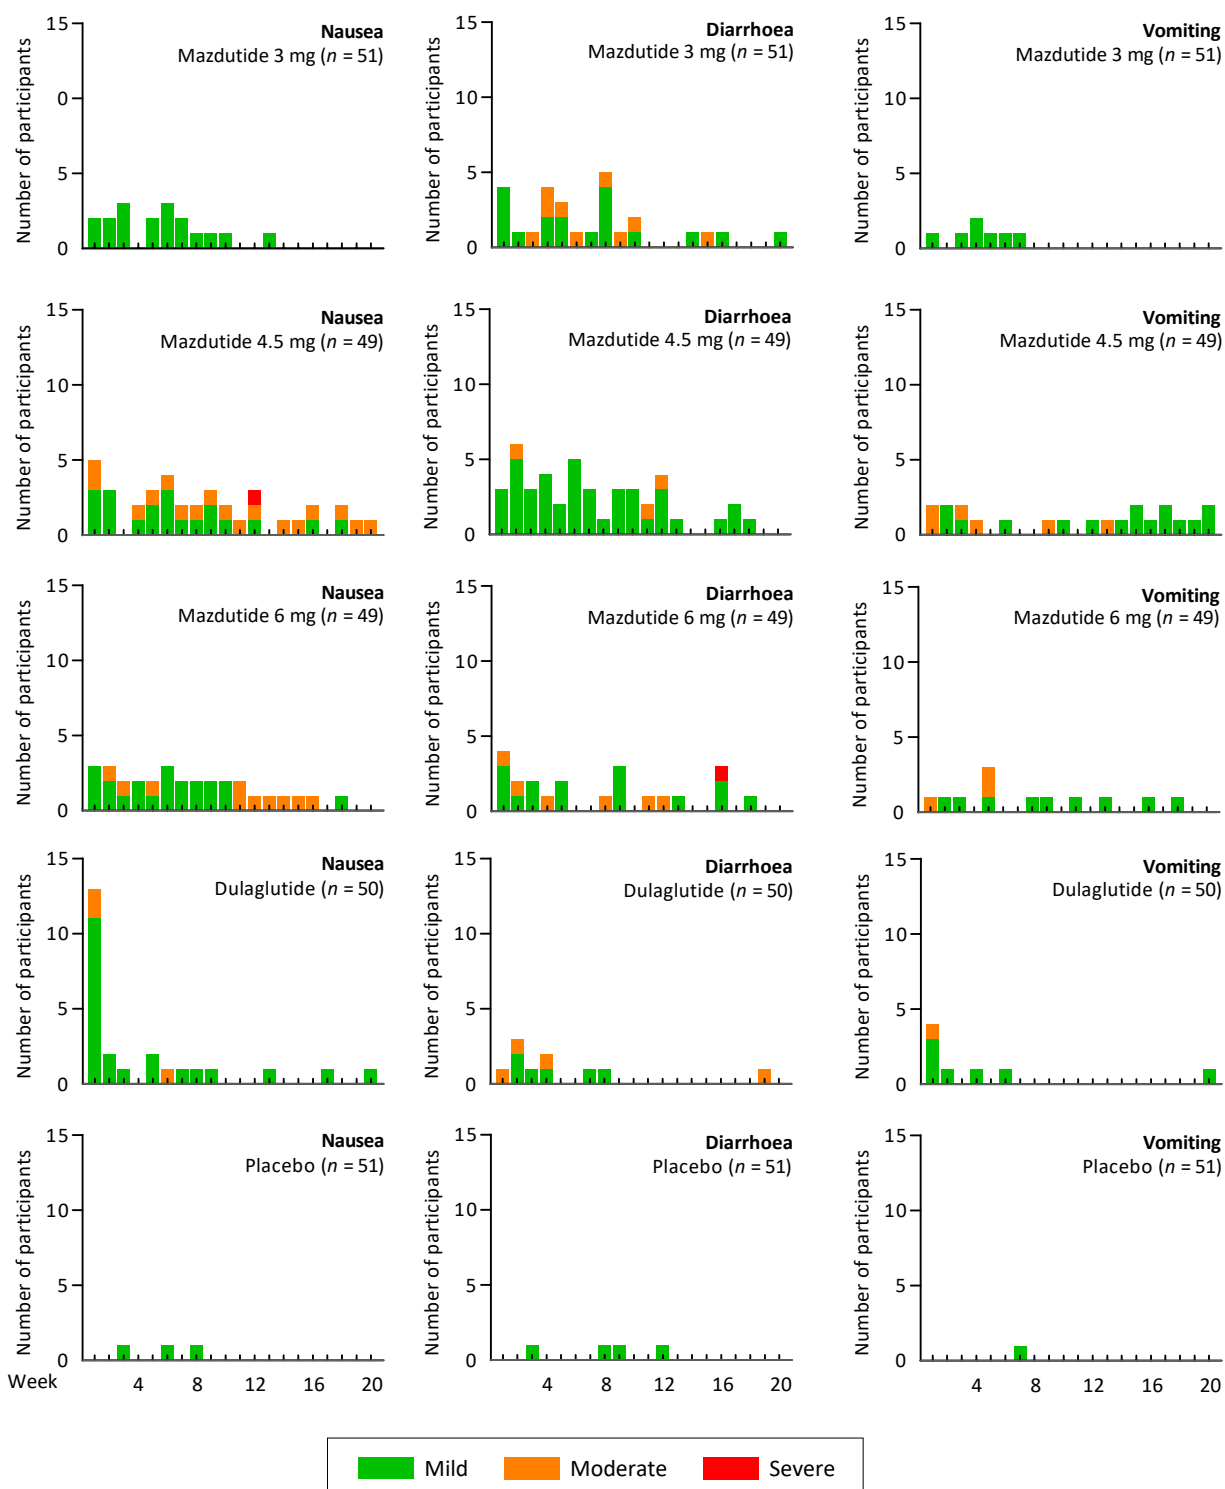

**Supplementary Figure 5: By-week incidence of diarrhoea, nausea and vomiting over time**

Safety population. For each study week, participants were counted once under each MedDRA preferred term and maximum severity.

**Supplementary Table 1: Primary and secondary outcomes on glycemic parameters and body weight**

|                                                                            | Mazdutide 3 mg<br>(n = 50) |         | Mazdutide 4.5 mg<br>(n = 48) |         | Mazdutide 6 mg<br>(n = 49) |         | Dulaglutide 1.5 mg<br>(n = 50) |         | Placebo<br>(n = 51) |
|----------------------------------------------------------------------------|----------------------------|---------|------------------------------|---------|----------------------------|---------|--------------------------------|---------|---------------------|
|                                                                            | Mean                       | p       | Mean                         | p       | Mean                       | p       | Mean                           | p       | Mean                |
| <b>Primary outcome</b>                                                     |                            |         |                              |         |                            |         |                                |         |                     |
| <b>Change from baseline to week 20 in HbA<sub>1c</sub> (MMRM), %</b>       | -1.41 (0.15)               |         | -1.67 (0.14)                 |         | -1.55 (0.14)               |         | -1.35 (0.14)                   |         | 0.03 (0.14)         |
| Versus placebo                                                             | -1.44 (-1.84, -1.04)       | <0.0001 | -1.70 (-2.09, -1.30)         | <0.0001 | -1.58 (-1.98, -1.18)       | <0.0001 | -1.38 (-1.77, -0.98)           | <0.0001 |                     |
| Versus dulaglutide                                                         | -0.06 (-0.46, 0.34)        | 0.7513  | -0.32 (-0.71, 0.08)          | 0.1120  | -0.20 (-0.60, 0.20)        | 0.3213  |                                |         |                     |
| <b>Change from baseline to week 20 in HbA<sub>1c</sub> (ANCOVA), %</b>     | -1.31 (0.12)               |         | -1.62 (0.13)                 |         | -1.45 (0.13)               |         | -1.38 (0.12)                   |         | -0.14 (0.12)        |
| Versus placebo                                                             | -1.17 (-1.51, -0.83)       | <0.0001 | -1.48 (-1.83, -1.14)         | <0.0001 | -1.31 (-1.66, -0.97)       | <0.0001 | -1.24 (-1.58, -0.89)           | <0.0001 |                     |
| Versus dulaglutide                                                         | 0.07 (-0.28, 0.41)         | 0.6983  | -0.24 (-0.59, 0.10)          | 0.1681  | -0.08 (-0.42, 0.27)        | 0.6642  |                                |         |                     |
| <b>Secondary outcomes</b>                                                  |                            |         |                              |         |                            |         |                                |         |                     |
| <b>Participants with HbA<sub>1c</sub> &lt;7.0% at week 20, n (%)</b>       | 27 (54.0)                  |         | 32 (66.7)                    |         | 36 (73.5)                  |         | 30 (60.0)                      |         | 9 (17.6)            |
| Odds ratio versus placebo                                                  | 10.34 (3.93, 27.22)        | <0.0001 | 17.91 (6.15, 52.21)          | <0.0001 | 22.16 (7.49, 65.52)        | <0.0001 | 13.00 (4.58, 36.86)            | <0.0001 |                     |
| Odds ratio versus dulaglutide                                              | 0.98 (0.40, 2.43)          | 0.9659  | 1.41 (0.53, 3.73)            | 0.4880  | 2.06 (0.74, 5.77)          | 0.1682  |                                |         |                     |
| <b>Participants with HbA<sub>1c</sub> ≤6.5% at week 20, n (%)</b>          | 14 (28.0)                  |         | 27 (56.3)                    |         | 25 (51.0)                  |         | 23 (46.0)                      |         | 4 (7.8)             |
| Odds ratio versus placebo                                                  | 7.82 (2.39, 25.63)         | 0.0007  | 24.06 (6.92, 83.62)          | <0.0001 | 18.72 (5.60, 62.58)        | <0.0001 | 15.13 (4.43, 51.64)            | <0.0001 |                     |
| Odds ratio versus dulaglutide                                              | 0.60 (0.26, 1.37)          | 0.2243  | 1.66 (0.70, 3.99)            | 0.2526  | 1.34 (0.57, 3.16)          | 0.4994  |                                |         |                     |
| <b>Participants with HbA<sub>1c</sub> &lt;5.7% at week 20, n (%)</b>       | 4 (8.0)                    |         | 5 (10.4)                     |         | 3 (6.1)                    |         | 5 (10.0)                       |         | 1 (2.0)             |
| Odds ratio versus placebo                                                  | 7.85 (0.81, 76.46)         | 0.0761  | 8.92 (0.90, 88.24)           | 0.0613  | 6.65 (0.64, 68.83)         | 0.1120  | 7.24 (0.76, 69.38)             | 0.0858  |                     |
| Odds ratio versus dulaglutide                                              | 1.09 (0.28, 4.17)          | 0.9048  | 1.16 (0.30, 4.44)            | 0.8248  | 0.89 (0.21, 3.76)          | 0.8777  |                                |         |                     |
| <b>Change from baseline to week 20 in fasting plasma glucose, mmol/L</b>   | -1.40 (0.29)               |         | -2.40 (0.28)                 |         | -2.58 (0.28)               |         | -2.06 (0.28)                   |         | 0.05 (0.28)         |
| Versus placebo                                                             | -1.46 (-2.24, -0.67)       | 0.0003  | -2.46 (-3.24, -1.68)         | <0.0001 | -2.63 (-3.41, -1.85)       | <0.0001 | -2.12 (-2.89, -1.34)           | <0.0001 |                     |
| Versus dulaglutide                                                         | 0.66 (-0.13, 1.45)         | 0.1014  | -0.34 (-1.12, 0.44)          | 0.3881  | -0.52 (-1.30, 0.27)        | 0.1946  |                                |         |                     |
| <b>Change from baseline to week 20 in 2-h postprandial glucose, mmol/L</b> | -3.99 (0.50)               |         | -5.55 (0.48)                 |         | -5.43 (0.48)               |         | -4.78 (0.48)                   |         | -0.09 (0.48)        |
| Versus placebo                                                             | -3.90 (-5.26, -2.54)       | <0.0001 | -5.46 (-6.80, -4.13)         | <0.0001 | -5.34 (-6.67, -4.02)       | <0.0001 | -4.69 (-6.01, -3.36)           | <0.0001 |                     |
| Versus dulaglutide                                                         | 0.79 (-0.57, 2.14)         | 0.2529  | -0.78 (-2.10, 0.55)          | 0.2479  | -0.66 (-1.98, 0.66)        | 0.3260  |                                |         |                     |
| <b>Change from baseline to week 20 in fasting insulin, mU/L</b>            | 0.45 (0.93)                |         | -1.55 (0.91)                 |         | -3.04 (0.90)               |         | -0.19 (0.91)                   |         | -0.32 (0.90)        |
| Versus placebo                                                             | 0.77 (-1.76, 3.30)         | 0.5479  | -1.23 (-3.73, 1.26)          | 0.3313  | -2.72 (-5.21, -0.22)       | 0.0329  | 0.13 (-2.37, 2.64)             | 0.9181  |                     |
| Versus dulaglutide                                                         | 0.64 (-1.90, 3.18)         | 0.6193  | -1.36 (-3.87, 1.14)          | 0.2851  | -2.85 (-5.35, -0.35)       | 0.0258  |                                |         |                     |
| <b>Percent change from baseline to week 20 in body weight, %</b>           | -4.12 (0.68)               |         | -5.31 (0.67)                 |         | -7.11 (0.68)               |         | -2.69 (0.67)                   |         | -1.38 (0.67)        |

|                                                                                          | Mazdutide 3 mg<br>(n = 50) |        | Mazdutide 4.5 mg<br>(n = 48) |         | Mazdutide 6 mg<br>(n = 49) |         | Dulaglutide 1.5 mg<br>(n = 50) |        | Placebo<br>(n = 51) |
|------------------------------------------------------------------------------------------|----------------------------|--------|------------------------------|---------|----------------------------|---------|--------------------------------|--------|---------------------|
|                                                                                          | Mean                       | p      | Mean                         | p       | Mean                       | p       | Mean                           | p      | Mean                |
| Versus placebo                                                                           | -2.74 (-4.62, -0.86)       | 0.0045 | -3.92 (-5.78, -2.06)         | <0.0001 | -5.73 (-7.61, -3.85)       | <0.0001 | -1.31 (-3.18, 0.55)            | 0.1672 |                     |
| Versus dulaglutide                                                                       | -1.43 (-3.32, 0.46)        | 0.1367 | -2.61 (-4.48, -0.75)         | 0.0062  | -4.42 (-6.30, -2.53)       | <0.0001 |                                |        |                     |
| <b>Change from baseline to week 20 in body weight, kg</b>                                | -3.02 (0.50)               |        | -3.81 (0.48)                 |         | -5.29 (0.50)               |         | -1.82 (0.49)                   |        | -0.97 (0.49)        |
| Versus placebo                                                                           | -2.05 (-3.42, -0.69)       | 0.0034 | -2.85 (-4.20, -1.50)         | <0.0001 | -4.33 (-5.69, -2.96)       | <0.0001 | -0.86 (-2.21, 0.50)            | 0.2127 |                     |
| Versus dulaglutide                                                                       | -1.20 (-2.56, 0.17)        | 0.0867 | -1.99 (-3.34, -0.64)         | 0.0041  | -3.47 (-4.84, -2.10)       | <0.0001 |                                |        |                     |
| <b>Participants with ≥5% weight loss at week 20, n (%)</b>                               | 12 (24.0)                  |        | 18 (37.5)                    |         | 28 (57.1)                  |         | 9 (18.0)                       |        | 5 (9.8)             |
| Odds ratio versus placebo                                                                | 3.76 (1.27, 11.18)         | 0.0170 | 5.63 (1.85, 17.11)           | 0.0023  | 16.4 (5.23, 51.44)         | <0.0001 | 2.34 (0.73, 7.49)              | 0.1507 |                     |
| Odds ratio versus dulaglutide                                                            | 1.61 (0.65, 4.03)          | 0.3065 | 2.41 (0.94, 6.15)            | 0.0657  | 7.10 (2.71, 18.58)         | <0.0001 |                                |        |                     |
| <b>Participants with ≥10% weight loss at week 20, n (%)</b>                              | 5 (10.0)                   |        | 7 (14.6)                     |         | 12 (24.5)                  |         | 0                              |        | 0                   |
| Odds ratio versus placebo                                                                | 9.21 (1.07, 79.37)         | 0.0434 | 11.28 (1.35, 94.40)          | 0.0254  | 21.88 (2.70, 177.00)       | 0.0038  |                                |        |                     |
| Odds ratio versus dulaglutide                                                            | 8.02 (0.95, 67.81)         | 0.0588 | 9.75 (1.18, 80.81)           | 0.0348  | 19.10 (2.42, 150.83)       | 0.0052  |                                |        |                     |
| <b>Participants with ≥5% weight loss and HbA<sub>1c</sub> &lt;7.0% at week 20, n (%)</b> | 8 (16.0)                   |        | 14 (29.2)                    |         | 24 (49.0)                  |         | 6 (12.0)                       |        | 0                   |
| Odds ratio versus placebo                                                                | 16.57 (2.04, 134.89)       | 0.0087 | 21.79 (2.66, 178.37)         | 0.0041  | 65.25 (8.18, 520.74)       | <0.0001 | 9.68 (1.13, 82.56)             | 0.0380 |                     |
| Odds ratio versus dulaglutide                                                            | 1.68 (0.57, 4.94)          | 0.3479 | 2.79 (0.99, 7.85)            | 0.0517  | 7.87 (2.82, 21.99)         | <0.0001 |                                |        |                     |

Data are LSM (SE) for changes and percent changes from baseline and LSM (95% CI) for estimated treatment differences, from MMRM or ANCOVA analysis; n (%) and odds ratio (95% CI) for weight loss and HbA<sub>1c</sub> target attainment rates, from Mantel-Haenszel analysis; mITT population. Proportion of participants reaching HbA<sub>1c</sub> or weight loss targets was obtained by dividing the number of participants reaching respective targets at week 20 by the number of participants in the mITT population. ANCOVA=analysis of covariance. HbA<sub>1c</sub>=glycated haemoglobin A1c. LSM=least squares mean. MMRM=mixed model repeated measures.



**Supplementary Table 2: Exploratory outcomes on HOMA2-B and HOMA2-IR**

|                                                  | Mazdutide 3 mg<br>(n = 50) |        | Mazdutide 4.5 mg<br>(n = 48) |        | Mazdutide 6 mg<br>(n = 49) |        | Dulaglutide 1.5 mg<br>(n = 50) |        | Placebo<br>(n = 51) |
|--------------------------------------------------|----------------------------|--------|------------------------------|--------|----------------------------|--------|--------------------------------|--------|---------------------|
|                                                  | Mean                       | p      | Mean                         | p      | Mean                       | p      | Mean                           | p      | Mean                |
| <b>HOMA2-B, % (derived from fasting insulin)</b> |                            |        |                              |        |                            |        |                                |        |                     |
| Baseline                                         | 44.12 (28.869)             |        | 37.55 (21.463)               |        | 54.89 (78.594)             |        | 44.38 (29.278)                 |        | 37.76 (17.517)      |
| Change from baseline to week 20                  | 15.40 (4.68)               |        | 26.85 (4.57)                 |        | 20.79 (4.54)               |        | 27.48 (4.60)                   |        | 2.55 (4.56)         |
| Versus placebo                                   | 12.85 (0.06, 25.63)        | 0.0489 | 24.3 (11.68, 36.92)          | 0.0002 | 18.24 (5.63, 30.85)        | 0.0048 | 24.93 (12.25, 37.61)           | 0.0001 |                     |
| <b>HOMA2-IR (derived from fasting insulin)</b>   |                            |        |                              |        |                            |        |                                |        |                     |
| Baseline                                         | 1.736 (1.2873)             |        | 1.552 (1.0892)               |        | 2.430 (3.5252)             |        | 1.626 (1.9342)                 |        | 1.510 (0.9235)      |
| Change from baseline to week 20                  | -0.00 (0.13)               |        | -0.31 (0.13)                 |        | -0.51 (0.13)               |        | -0.11 (0.13)                   |        | 0.00 (0.13)         |
| Versus placebo                                   | -0.00 (-0.36, 0.35)        | 0.9817 | -0.31 (-0.66, 0.04)          | 0.0845 | -0.52 (-0.87, -0.17)       | 0.0040 | -0.11 (-0.46, 0.24)            | 0.5397 |                     |

Data are mean (SD) for baseline; LSM (SE) for changes from baseline and LSM (95% CI) for estimated treatment differences, from MMRM analysis, mITT population. LSM=least squares mean. MMRM=mixed model repeated measures. SD=standard deviation. SE=standard error.

**Supplementary Table 3: Secondary outcomes on BMI, waist circumference and blood pressure**

|                                        | Mazdutide 3 mg<br>(n = 50) |        | Mazdutide 4.5 mg<br>(n = 48) |         | Mazdutide 6 mg<br>(n = 49) |         | Dulaglutide 1.5 mg<br>(n = 50) |        | Placebo<br>(n = 51) |
|----------------------------------------|----------------------------|--------|------------------------------|---------|----------------------------|---------|--------------------------------|--------|---------------------|
|                                        | Mean                       | p      | Mean                         | p       | Mean                       | p       | Mean                           | p      | Mean                |
| <b>BMI, kg/m<sup>2</sup></b>           |                            |        |                              |         |                            |         |                                |        |                     |
| Baseline                               | 28.0 (4.8)                 |        | 27.3 (3.8)                   |         | 27.2 (3.4)                 |         | 26.7 (3.2)                     |        | 27.5 (3.5)          |
| Change from baseline to week 20        | -1.10 (0.18)               |        | -1.43 (0.18)                 |         | -1.90 (0.18)               |         | -0.71 (0.18)                   |        | -0.37 (0.18)        |
| Versus placebo                         | -0.73 (-1.23, -0.23)       | 0.0046 | -1.06 (-1.56, -0.56)         | <0.0001 | -1.53 (-2.03, -1.02)       | <0.0001 | -0.33 (-0.83, 0.16)            | 0.1863 |                     |
| Versus dulaglutide                     | -0.39 (-0.90, 0.11)        | 0.1245 | -0.72 (-1.22, -0.23)         | 0.0045  | -1.19 (-1.69, -0.69)       | <0.0001 |                                |        |                     |
| <b>Waist circumference, cm</b>         |                            |        |                              |         |                            |         |                                |        |                     |
| Baseline                               | 96.8 (11.0)                |        | 95.5 (9.3)                   |         | 94.7 (9.2)                 |         | 93.5 (8.8)                     |        | 95.0 (9.0)          |
| Change from baseline to week 20        | -3.10 (0.63)               |        | -4.31 (0.61)                 |         | -5.11 (0.62)               |         | -2.59 (0.61)                   |        | -1.33 (0.61)        |
| Versus placebo                         | -1.77 (-3.49, -0.05)       | 0.0441 | -2.98 (-4.68, -1.29)         | 0.0006  | -3.79 (-5.51, -2.06)       | <0.0001 | -1.26 (-2.97, 0.44)            | 0.1459 |                     |
| Versus dulaglutide                     | -0.51 (-2.23, 1.22)        | 0.5629 | -1.72 (-3.42, -0.02)         | 0.0470  | -2.52 (-4.24, -0.80)       | 0.0043  |                                |        |                     |
| <b>Systolic blood pressure, mm Hg</b>  |                            |        |                              |         |                            |         |                                |        |                     |
| Baseline                               | 128.5 (13.1)               |        | 130.5 (11.2)                 |         | 128.9 (11.7)               |         | 125.6 (13.3)                   |        | 128.7 (12.8)        |
| Change from baseline to week 20        | -6.50 (1.55)               |        | -8.87 (1.52)                 |         | -6.08 (1.48)               |         | -3.47 (1.50)                   |        | -1.34 (1.52)        |
| Versus placebo                         | -5.17 (-9.42, -0.91)       | 0.0173 | -7.53 (-11.73, -3.33)        | 0.0004  | -4.74 (-8.89, -0.59)       | 0.0252  | -2.14 (-6.31, 2.04)            | 0.3158 |                     |
| Versus dulaglutide                     | -3.03 (-7.26, 1.20)        | 0.1597 | -5.40 (-9.57, -1.22)         | 0.0113  | -2.60 (-6.73, 1.52)        | 0.2156  |                                |        |                     |
| <b>Diastolic blood pressure, mm Hg</b> |                            |        |                              |         |                            |         |                                |        |                     |
| Baseline                               | 82.3 (8.6)                 |        | 82.6 (7.9)                   |         | 82.6 (8.1)                 |         | 80.9 (8.6)                     |        | 82.0 (6.8)          |
| Change from baseline to week 20        | -4.32 (0.95)               |        | -4.46 (0.93)                 |         | -1.58 (0.91)               |         | -1.87 (0.92)                   |        | -0.77 (0.93)        |
| Versus placebo                         | -3.55 (-6.17, -0.94)       | 0.0077 | -3.69 (-6.27, -1.11)         | 0.0050  | -0.81 (-3.36, 1.74)        | 0.5342  | -1.10 (-3.66, 1.47)            | 0.4013 |                     |
| Versus dulaglutide                     | -2.46 (-5.05, 0.14)        | 0.0637 | -2.60 (-5.16, -0.03)         | 0.0472  | 0.29 (-2.24, 2.82)         | 0.8229  |                                |        |                     |

Data are LSM (SE) for changes and percent changes from baseline and LSM (95% CI) for estimated treatment differences, from MMRM analysis, mITT population. BMI=body-mass index. LSM=least squares mean. MMRM=mixed model repeated measures. SE=standard error.

**Supplementary Table 4: Secondary outcomes on lipids panel, transaminase and serum uric acid**

|                                            | Mazdutide 3 mg<br>(n = 50) |        | Mazdutide 4.5 mg<br>(n = 48) |         | Mazdutide 6 mg<br>(n = 49) |         | Dulaglutide 1.5 mg<br>(n = 50) |        | Placebo<br>(n = 51) |
|--------------------------------------------|----------------------------|--------|------------------------------|---------|----------------------------|---------|--------------------------------|--------|---------------------|
|                                            | Mean                       | p      | Mean                         | p       | Mean                       | p       | Mean                           | p      | Mean                |
| <b>Total cholesterol</b>                   |                            |        |                              |         |                            |         |                                |        |                     |
| Baseline, mmol/L                           | 4.8 (4.2–5.5)              |        | 4.5 (4.0–5.1)                |         | 4.4 (3.8–5.0)              |         | 4.3 (4.0–5.0)                  |        | 4.5 (4.1–5.0)       |
| Change from baseline to week 20, mmol/L    | –0.09 (0.13)               |        | –0.23 (0.13)                 |         | –0.44 (0.12)               |         | 0.17 (0.12)                    |        | 0.46 (0.13)         |
| Percent change from baseline to week 20, % | –0.03 (3.12)               |        | –2.54 (3.01)                 |         | –9.53 (2.97)               |         | 4.67 (2.99)                    |        | 11.93 (3.01)        |
| Versus placebo                             | –11.96 (–20.43, –3.49)     | 0.0059 | –14.47 (–22.79, –6.15)       | 0.0007  | –21.46 (–29.69, –13.23)    | <0.0001 | –7.26 (–15.53, 1.02)           | 0.0852 |                     |
| Versus dulaglutide                         | –4.70 (–13.17, 3.77)       | 0.2754 | –7.21 (–15.50, 1.08)         | 0.0878  | –14.20 (–22.36, –6.03)     | 0.0007  |                                |        |                     |
| <b>LDL cholesterol</b>                     |                            |        |                              |         |                            |         |                                |        |                     |
| Baseline, mmol/L                           | 3.1 (2.7–3.6)              |        | 2.9 (2.7–3.4)                |         | 2.8 (2.4–3.3)              |         | 2.9 (2.5–3.3)                  |        | 2.9 (2.5–3.4)       |
| Change from baseline to week 20, mmol/L    | –0.05 (0.10)               |        | –0.17 (0.10)                 |         | –0.32 (0.09)               |         | 0.11 (0.09)                    |        | 0.24 (0.10)         |
| Percent change from baseline to week 20, % | 1.25 (3.85)                |        | –2.79 (3.72)                 |         | –10.61 (3.66)              |         | 5.05 (3.68)                    |        | 11.84 (3.71)        |
| Versus placebo                             | –10.59 (–21.04, –0.14)     | 0.0471 | –14.63 (–24.90, –4.36)       | 0.0055  | –22.45 (–32.59, –12.30)    | <0.0001 | –6.79 (–16.98, 3.41)           | 0.1906 |                     |
| Versus dulaglutide                         | –3.80 (–14.22, 6.63)       | 0.4732 | –7.84 (–18.07, 2.38)         | 0.1319  | –15.66 (–25.73, –5.59)     | 0.0025  |                                |        |                     |
| <b>HDL cholesterol</b>                     |                            |        |                              |         |                            |         |                                |        |                     |
| Baseline, mmol/L                           | 1.2 (1.0–1.4)              |        | 1.1 (0.9–1.3)                |         | 1.1 (1.0–1.3)              |         | 1.1 (0.9–1.3)                  |        | 1.2 (1.0–1.3)       |
| Change from baseline to week 20, mmol/L    | –0.06 (0.03)               |        | 0.01 (0.03)                  |         | –0.02 (0.02)               |         | 0.05 (0.02)                    |        | 0.07 (0.03)         |
| Percent change from baseline to week 20, % | –3.47 (2.36)               |        | 1.61 (2.30)                  |         | –0.47 (2.26)               |         | 5.92 (2.27)                    |        | 6.96 (2.29)         |
| Versus placebo                             | –10.43 (–16.85, –4.01)     | 0.0016 | –5.35 (–11.70, 1.00)         | 0.0983  | –7.44 (–13.70, –1.17)      | 0.0202  | –1.04 (–7.34, 5.25)            | 0.7446 |                     |
| Versus dulaglutide                         | –9.39 (–15.77, –3.01)      | 0.0042 | –4.31 (–10.62, 2.00)         | 0.1798  | –6.40 (–12.62, –0.17)      | 0.0440  |                                |        |                     |
| <b>Triglycerides</b>                       |                            |        |                              |         |                            |         |                                |        |                     |
| Baseline, mmol/L                           | 1.7 (1.3–2.5)              |        | 1.6 (1.2–2.3)                |         | 2.1 (1.2–3.0)              |         | 1.6 (1.1–2.3)                  |        | 1.8 (1.2–2.5)       |
| Change from baseline to week 20, mmol/L    | –0.23 (0.15)               |        | –0.52 (0.15)                 |         | –0.77 (0.14)               |         | –0.26 (0.14)                   |        | 0.34 (0.15)         |
| Percent change from baseline to week 20, % | –1.46 (6.60)               |        | –16.98 (6.43)                |         | –29.97 (6.32)              |         | –3.73 (6.37)                   |        | 23.94 (6.43)        |
| Versus placebo                             | –25.40 (–43.38, –7.42)     | 0.0059 | –40.93 (–58.70, –23.16)      | <0.0001 | –53.91 (–71.45, –36.37)    | <0.0001 | –27.67 (–45.38, –9.97)         | 0.0023 |                     |
| Versus dulaglutide                         | 2.27 (–15.63, 20.18)       | 0.8025 | –13.25 (–30.90, 4.39)        | 0.1401  | –26.24 (–43.71, –8.77)     | 0.0034  |                                |        |                     |
| <b>Alanine aminotransferase</b>            |                            |        |                              |         |                            |         |                                |        |                     |
| Baseline, U/L                              | 18.0 (13.0–27.0)           |        | 21.0 (13.0–34.0)             |         | 18.0 (14.0–24.0)           |         | 18.0 (14.0–30.0)               |        | 23.0 (15.0–33.0)    |

|                                            | Mazdutide 3 mg<br>(n = 50) |        | Mazdutide 4.5 mg<br>(n = 48) |        | Mazdutide 6 mg<br>(n = 49) |        | Dulaglutide 1.5 mg<br>(n = 50) |        | Placebo<br>(n = 51) |
|--------------------------------------------|----------------------------|--------|------------------------------|--------|----------------------------|--------|--------------------------------|--------|---------------------|
|                                            | Mean                       | p      | Mean                         | p      | Mean                       | p      | Mean                           | p      | Mean                |
| Change from baseline to week 20, U/L       | -4.89 (1.77)               |        | -7.28 (1.74)                 |        | -7.09 (1.71)               |        | -3.63 (1.71)                   |        | -2.24 (1.73)        |
| Percent change from baseline to week 20, % | -12.62 (8.64)              |        | -15.83 (8.46)                |        | -21.23 (8.30)              |        | 6.05 (8.32)                    |        | -3.57 (8.43)        |
| Versus placebo                             | -9.05 (-32.61, 14.51)      | 0.4497 | -12.25 (-35.50, 11.00)       | 0.3000 | -17.66 (-40.76, 5.44)      | 0.1332 | 9.62 (-13.50, 32.74)           | 0.4130 |                     |
| Versus dulaglutide                         | -18.67 (-42.08, 4.74)      | 0.1174 | -21.87 (-45.04, 1.30)        | 0.0641 | -27.28 (-50.14, -4.41)     | 0.0196 |                                |        |                     |
| <b>Aspartate aminotransferase</b>          |                            |        |                              |        |                            |        |                                |        |                     |
| Baseline, U/L                              | 19.0 (16.0–29.0)           |        | 20.0 (16.0–28.0)             |        | 19.0 (17.0–24.0)           |        | 20.5 (17.0–27.0)               |        | 21.0 (17.0–28.0)    |
| Change from baseline to week 20, U/L       | -4.22 (1.54)               |        | -4.71 (1.50)                 |        | -4.48 (1.48)               |        | -1.29 (1.48)                   |        | -1.25 (1.50)        |
| Percent change from baseline to week 20, % | -10.13 (6.20)              |        | -14.78 (6.05)                |        | -12.70 (5.96)              |        | 6.45 (5.99)                    |        | -3.63 (6.05)        |
| Versus placebo                             | -6.51 (-23.43, 10.42)      | 0.4492 | -11.15 (-27.83, 5.54)        | 0.1891 | -9.08 (-25.67, 7.51)       | 0.2820 | 10.08 (-6.50, 26.66)           | 0.2320 |                     |
| Versus dulaglutide                         | -16.59 (-33.41, 0.23)      | 0.0532 | -21.23 (-37.81, -4.65)       | 0.0124 | -19.15 (-35.64, -2.67)     | 0.0230 |                                |        |                     |
| <b>Serum uric acid</b>                     |                            |        |                              |        |                            |        |                                |        |                     |
| Baseline, µmol/L                           | 327.86 (91.747)            |        | 310.51 (74.545)              |        | 315.01 (75.175)            |        | 313.63 (94.457)                |        | 303.44 (99.964)     |
| Change from baseline to week 20, µmol/L    | -1.97 (9.69)               |        | -7.00 (9.42)                 |        | -15.38 (9.25)              |        | 7.39 (9.34)                    |        | -0.49 (9.42)        |
| Percent change from baseline to week 20, % | 0.93 (3.16)                |        | -1.52 (3.07)                 |        | -4.50 (3.02)               |        | 3.99 (3.05)                    |        | 1.91 (3.07)         |
| Versus placebo                             | -0.98 (-9.60, 7.63)        | 0.8222 | -3.43 (-11.92, 5.06)         | 0.4267 | -6.41 (-14.80, 1.98)       | 0.1337 | 2.08 (-6.37, 10.53)            | 0.6276 |                     |
| Versus dulaglutide                         | -3.06 (-11.61, 5.48)       | 0.4804 | -5.51 (-13.96, 2.94)         | 0.2000 | -8.49 (-16.85, -0.13)      | 0.0465 |                                |        |                     |

Data are mean (SD) or median (interquartile range) for baseline; LSM (SE) for changes and percent changes from baseline and LSM (95% CI) for estimated treatment differences, from MMRM analysis, mITT population. CFB=change from baseline. HDL=high-density lipoprotein. LDL=low-density lipoprotein. LSM=least squares mean. MMRM=mixed model repeated measures. SD=standard deviation. SE=standard error.

**Supplementary Table 5: Hypoglycemic episodes**

|                          | Mazdutide 3 mg<br>(n =51) | Mazdutide 4.5 mg<br>(n = 49) | Mazdutide 6 mg<br>(n = 49) | Dulaglutide 1.5 mg<br>(n = 50) | Placebo<br>(n = 51) |
|--------------------------|---------------------------|------------------------------|----------------------------|--------------------------------|---------------------|
| <b>Any hypoglycaemia</b> | 3 (5.9)<br>[4]            | 4 (8.2)<br>[6]               | 8 (16.3)<br>[13]           | 1 (2.0)<br>[2]                 | 4 (7.8)<br>[5]      |
| Severe                   | 0                         | 0                            | 0                          | 0                              | 0                   |
| Documented symptomatic   | 1 (2.0)<br>[1]            | 0                            | 0                          | 0                              | 0                   |
| Asymptomatic             | 1 (2.0)<br>[1]            | 3 (6.1)<br>[5]               | 6 (12.2)<br>[7]            | 1 (2.0)<br>[2]                 | 3 (5.9)<br>[4]      |
| Probable symptomatic     | 1 (2.0)<br>[2]            | 1 (2.0)<br>[1]               | 3 (6.1)<br>[5]             | 0                              | 1 (2.0)<br>[1]      |
| Pseudo-                  | 0                         | 0                            | 1 (2.0)<br>[1]             | 0                              | 0                   |

Data are n (%) [number of events], safety population. American Diabetes Association 2013 classification of hypoglycemia.

**Supplementary Table 6: Laboratory safety outcomes and immunogenicity**

|                                                                       | Mazdutide 3 mg<br>(n = 51) | Mazdutide 4.5 mg<br>(n = 49) | Mazdutide 6 mg<br>(n = 49) | Dulaglutide 1.5 mg<br>(n = 50) | Placebo<br>(n = 51) |
|-----------------------------------------------------------------------|----------------------------|------------------------------|----------------------------|--------------------------------|---------------------|
| Participants with $\geq 3$ times upper limit of normal ALT, n (%)     | 0                          | 0                            | 0                          | 0                              | 0                   |
| Participants with $\geq 3$ times upper limit of normal AST, n (%)     | 0                          | 0                            | 0                          | 1 (2.0)                        | 0                   |
| Participants with $\geq 3$ times upper limit of normal lipase, n (%)  | 0                          | 0                            | 0                          | 1 (2.0)                        | 0                   |
| Participants with $\geq 3$ times upper limit of normal amylase, n (%) | 0                          | 0                            | 0                          | 0                              | 0                   |
| Calcitonin $\geq 20$ ng/L, n (%)                                      | 0                          | 0                            | 0                          | 0                              | 0                   |
| <b>Participants with mazdutide anti-drug antibodies (ADA), n (%)</b>  |                            |                              |                            |                                |                     |
| At baseline                                                           | 0                          | 3 (6.1)                      | 3 (6.1)                    |                                |                     |
| Post baseline treatment-induced ADA                                   | 5 (9.8)                    | 10 (20.4)                    | 9 (18.4)                   |                                |                     |
| Post baseline treatment-emergent ADA                                  | 0                          | 0                            | 0                          |                                |                     |

Data are n (%), safety population. All percentages are relative to the total number of participants in each treatment group in the safety population. A subject is considered to be treatment-induced ADA positive if the participant is ADA negative at baseline and has at least one post baseline positive measurement. A participant is considered to be treatment-emergent ADA positive if the participant is ADA positive at baseline and has at least one post baseline titre that is a 4-fold or greater increase in titre from baseline measurement.
